# Supplementary material for: Identification of Key Phospholipids That Bind and Activate Atypical PKCs
Source: PubMed Central journal article supplement (PMC7825596; doi:10.3390/biomedicines9010045), 2021-01-06
Supplement: biomedicines-09-00045-s001.pdf [file biomedicines-09-00045-s001.pdf]

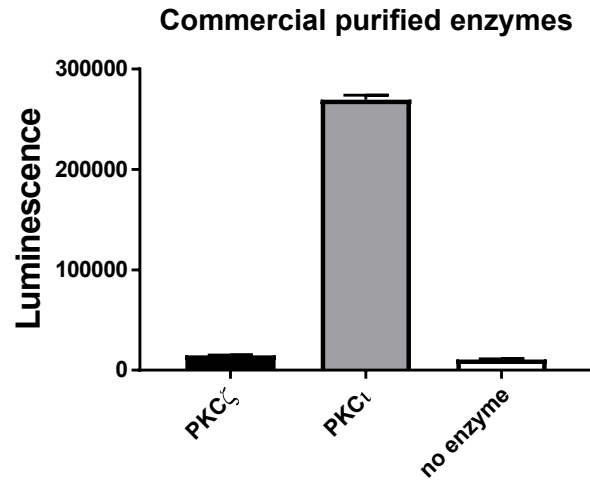

| PKC $\zeta$ | PKC $\iota$ | no enzyme |
|-------------|-------------|-----------|
| 14960       | 273854      | 11848     |
| 14854       | 273922      | 10029     |
| 15041       | 261339      | 10455     |

**Supplementary Figure 01:** *PKC $\zeta$  basal activity is quite low compared to PKC $\iota$*

The basal activity of commercial purified GST-PKC $\zeta$  (0.1 ng/ $\mu$ l) and GST-PKC $\iota$  (0.4 ng/ $\mu$ l) was measured in the preoptimized conditions of PKC $\zeta$  enzyme system, using ADP glow kinase assay system and luminescence as a readout of enzyme activity.
